# Supplementary material
Source: publisher figshare collection journal article supplement (https://sage.figshare.com/ndownloader/files/22827101)
Supplement: Supplementary file 1 [file 22827101]

**APPENDICES TO GLAS AND SPIERINGS (2020)**

**Connecting contextual and individual drivers of anti-Americanism in Arab countries**

Appendix A1. *Multilevel (logit) models of disaggregated American interventions on anti-Americanism*

|  |  | A1a | A1b | A1c | A2a | A2b | A2c | A3a | A3b | A3c |
| --- | --- | --- | --- | --- | --- | --- | --- | --- | --- | --- |
|  |  | Pol | Soc | Soc | Pol | Soc | Soc | Pol | Soc | Soc |
|  |  | 32 GAP | 32 GAP | 34 AB | 32 GAP | 32 GAP | 34 AB | 32 GAP | 32 GAP | 34 AB |
| **Context-level predictors** | |  |  |  |  |  |  |  |  |  |
| American troops | | 0.07 | **0.09** | 0.04 |  |  |  |  |  |  |
| American military assistance | |  |  |  | *0.08* | **0.10** | 0.08 |  |  |  |
| American economic interventions | |  |  |  |  |  |  | **0.14** | **0.19** | *0.15* |
| **Individual-level predictors** | |  |  |  |  |  |  |  |  |  |
| Denomination (ref. = non-Muslim) | |  |  |  |  |  |  |  |  |  |
|  | Muslim | **0.55** | **0.48** | **0.59** | **0.55** | **0.48** | **0.61** | **0.55** | **0.48** | **0.59** |
| Religiosity (ref. = not highly rel. Mus.) | | |  |  |  |  |  |  |  |  |
|  | Highly religious Muslim | **0.20** | **0.16** | **0.31** | **0.20** | **0.16** | **0.31** | **0.20** | **0.16** | **0.31** |
| Economic deprivation 1 (ref. = not dep.) | | |  |  |  |  |  |  |  |  |
|  | Economically deprived | 0.00 | *-0.05* | -0.07 | 0.00 | *-0.05* | -0.07 | 0.00 | *-0.05* | -0.06 |
| Societal dissatisfaction | |  |  | 0.00 |  |  | 0.00 |  |  | 0.00 |
|  | Societally dissatisfied (ref. = not) | 0.14 | **0.13** |  | **0.14** | **0.13** |  | **0.14** | **0.13** |  |
|  | Missing | **0.08** | **0.07** |  | **0.08** | **0.07** |  | **0.08** | **0.07** |  |
| **Control variables** | |  |  |  |  |  |  |  |  |  |
| Sex (ref. = male) | |  |  |  |  |  |  |  |  |  |
|  | Female | 0.01 | 0.02 | 0.00 | 0.01 | 0.02 | 0.00 | 0.01 | 0.02 | 0.00 |
| Age | | **0.00** | **0.00** | **-0.01** | **0.00** | **0.00** | **-0.01** | **0.00** | **0.00** | **-0.01** |
| Education | | -0.01 | **-0.02** | **-0.10** | -0.01 | **-0.02** | **-0.10** | -0.01 | **-0.02** | **-0.10** |
| Income (ref. = low) | |  |  |  |  |  |  |  |  |  |
|  | Medium | **-0.04** | **-0.05** | -0.01 | **-0.04** | **-0.05** | -0.01 | **-0.04** | **-0.05** | -0.01 |
|  | High | **-0.09** | **-0.14** | **-0.11** | **-0.09** | **-0.14** | **-0.11** | **-0.09** | **-0.14** | **-0.11** |
| Marital status (ref. = single) | |  |  |  |  |  |  |  |  |  |
|  | Married | 0.01 | 0.02 | 0.01 | 0.01 | 0.02 | 0.01 | 0.01 | 0.02 | 0.01 |
|  | Widowed | 0.04 | 0.03 |  | 0.04 | 0.03 |  | 0.04 | 0.03 |  |
|  | Separated | -0.01 | 0.01 |  | -0.01 | 0.01 |  | -0.01 | 0.01 |  |
|  | Divorced | 0.00 | 0.08 |  | 0.00 | 0.08 |  | 0.00 | 0.08 |  |
|  | Other |  |  | 0.08 |  |  | 0.08 |  |  | 0.08 |
| Employment status (ref. = employed) | | |  |  |  |  |  |  |  |  |
|  | Non-employed |  |  | 0.01 |  |  | 0.01 |  |  | 0.01 |
| Internet use (ref. = never) | |  |  |  |  |  |  |  |  |  |
|  | Yearly or monthly |  |  | 0.02 |  |  | 0.02 |  |  | 0.02 |
|  | Weekly |  |  | **-0.16** |  |  | **-0.16** |  |  | **-0.16** |
|  | Daily |  |  | **-0.28** |  |  | **-0.28** |  |  | **-0.28** |
|  | Missing |  |  | 0.18 |  |  | 0.18 |  |  | 0.18 |
| Months spent in West (ref. = none) | |  |  |  |  |  |  |  |  |  |
|  | Less than three |  |  | **-0.33** |  |  | **-0.33** |  |  | **-0.33** |
|  | Less than six |  |  | **-0.24** |  |  | **-0.24** |  |  | **-0.24** |
|  | More than six |  |  | **-0.28** |  |  | **-0.28** |  |  | **-0.28** |
|  | Missing |  |  | **0.23** |  |  | *0.22* |  |  | *0.22* |
| **Intercept** | | **1.29** | **1.14** | **-0.56** | **1.29** | **1.14** | **-0.58** | **1.30** | **1.14** | **-0.54** |

Sources: AB and GAP. Bold indicators indicate significance at α=0.05; italics at α=0.10.

Appendix A2. *Multilevel (logit) models of anti-Americanism with denomination moderations.*

|  |  | A4a | A4b | A4c | A5a | A5b | A5c | A6a | A6b | A6c |
| --- | --- | --- | --- | --- | --- | --- | --- | --- | --- | --- |
|  |  | Political | Societal | Societal | Political | Societal | Societal | Political | Societal | Societal |
|  |  | 32 GAP | 32 GAP | 34 AB | 32 GAP | 32 GAP | 34 AB | 32 GAP | 32 GAP | 34 AB |
| **Context-level predictors** | |  |  |  |  |  |  |  |  |  |
| American interventions | | **0.29** | **0.29** | 0.17 |  |  |  |  |  |  |
| Muslim shares | |  |  |  | **0.30** | **0.24** | **0.25** |  |  |  |
| Highly religious Muslim shares | |  |  |  |  |  |  | **0.26** | **0.20** | **0.03** |
| **Individual-level predictors** | |  |  |  |  |  |  |  |  |  |
| Denomination (ref. = non-Muslim) | |  |  |  |  |  |  |  |  |  |
|  | Muslim | **0.36** | **0.38** | **0.63** | **0.31** | **0.35** | **0.52** | **0.31** | **0.35** | **0.17** |
|  | * American interventions | **-0.19** | **-0.14** | -0.07 |  |  |  |  |  |  |
|  | * Muslim shares |  |  |  | **-0.23** | **-0.12** | 0.05 |  |  |  |
|  | * Highly religious Muslim shares |  |  |  |  |  |  | **-0.22** | **-0.12** | **-0.05** |
| Religiosity (ref. = not highly rel. Mus.) | | |  |  |  |  |  |  |  |  |
|  | Highly religious Muslim | **0.21** | **0.17** | **0.32** | **0.21** | **0.17** | **0.32** | **0.21** | **0.17** | **0.07** |
| Economic deprivation 1 (ref. = not dep.) | | |  |  |  |  |  |  |  |  |
|  | Economically deprived | 0.01 | **-0.05** | -0.04 | 0.01 | **-0.05** | -0.04 | 0.01 | **-0.05** | -0.01 |
| Societal dissatisfaction | |  |  | **-0.03** |  |  | **-0.03** |  |  | **-0.01** |
|  | Societally dissatisfied (ref. = not) | **0.14** | **0.12** |  | **0.14** | **0.12** |  | **0.14** | **0.12** |  |
|  | Missing | **0.07** | **0.07** |  | **0.07** | **0.07** |  | **0.07** | **0.07** |  |
| **Control variables** | |  |  |  |  |  |  |  |  |  |
| Sex (ref. = male) | |  |  |  |  |  |  |  |  |  |
|  | Female | 0.01 | 0.02 | -0.01 | 0.01 | 0.02 | -0.01 | 0.01 | 0.02 | 0.00 |
| Age | | **0.00** | **0.00** | **-0.01** | **0.00** | **0.00** | **-0.01** | **0.00** | **0.00** | **0.00** |
| Education | | -0.01 | **-0.02** | **-0.10** | -0.01 | **-0.02** | **-0.10** | -0.01 | **-0.02** | **-0.02** |
| Income (ref. = low) | |  |  |  |  |  |  |  |  |  |
|  | Medium | **-0.04** | **-0.05** | 0.00 | **-0.04** | **-0.05** | 0.00 | **-0.04** | **-0.05** | 0.00 |
|  | High | **-0.10** | **-0.14** | **-0.11** | **-0.10** | **-0.14** | **-0.11** | **-0.10** | **-0.14** | **-0.02** |
| Marital status (ref. = single) | |  |  |  |  |  |  |  |  |  |
|  | Married | 0.00 | 0.01 | 0.00 | 0.00 | 0.02 | 0.00 | 0.00 | 0.02 | 0.00 |
|  | Widowed | 0.03 | 0.03 |  | 0.03 | 0.03 |  | 0.03 | 0.03 |  |
|  | Separated | 0.02 | 0.02 |  | 0.02 | 0.02 |  | 0.02 | 0.02 |  |
|  | Divorced | -0.02 | 0.06 |  | -0.02 | 0.06 |  | -0.02 | 0.06 |  |
|  | Other |  |  | 0.07 |  |  | 0.07 |  |  | 0.02 |
| Employment status (ref. = employed) | | |  |  |  |  |  |  |  |  |
|  | Non-employed |  |  | 0.02 |  |  | 0.01 |  |  | 0.01 |
| Internet use (ref. = never) | |  |  |  |  |  |  |  |  |  |
|  | Yearly or monthly |  |  | 0.02 |  |  | 0.01 |  |  | 0.00 |
|  | Weekly |  |  | **-0.15** |  |  | **-0.16** |  |  | **-0.03** |
|  | Daily |  |  | **-0.27** |  |  | **-0.27** |  |  | **-0.06** |
|  | Missing |  |  | 0.17 |  |  | 0.17 |  |  | 0.04 |
| Months spent in West (ref. = none) | |  |  |  |  |  |  |  |  |  |
|  | Less than three |  |  | **-0.33** |  |  | **-0.33** |  |  | **-0.07** |
|  | Less than six |  |  | **-0.26** |  |  | **-0.26** |  |  | **-0.05** |
|  | More than six |  |  | **-0.27** |  |  | **-0.27** |  |  | **-0.05** |
|  | Missing |  |  | **0.25** |  |  | **0.24** |  |  | **0.06** |
| **Intercept** | | **1.49** | **1.24** | **-0.61** | **1.53** | **1.26** | **-0.52** | **1.53** | **1.26** | **0.33** |
| **Variances** | |  |  |  |  |  |  |  |  |  |
|  | Intercept | 0.16 | 0.09 | 0.20 | 0.12 | 0.11 | 0.12 | 0.14 |  | 0.00 |
|  | Muslim | 0.08 | 0.02 | 0.11 | 0.07 | 0.03 | 0.16 | 0.07 |  | 0.02 |

Sources: AB and GAP. Bold indicators indicate significance at α=0.05. Model A3c shows the results of linear probability models.

Appendix A3. *Multilevel (logit) models of anti-Americanism with religiosity moderations.*

|  |  | A7a | A7b | A7c | A8a | A8b | A8c | A9a | A9b | A9c |
| --- | --- | --- | --- | --- | --- | --- | --- | --- | --- | --- |
|  |  | Political | Societal | Societal | Political | Societal | Societal | Political | Societal | Societal |
|  |  | 32 GAP | 32 GAP | 34 AB | 32 GAP | 32 GAP | 34 AB | 32 GAP | 32 GAP | 34 AB |
| **Context-level predictors** | |  |  |  |  |  |  |  |  |  |
| American interventions | | **0.14** | **0.19** | 0.09 |  |  |  |  |  |  |
| Muslim shares | |  |  |  | **0.14** | **0.20** | **0.26** |  |  |  |
| Highly religious Muslim shares | |  |  |  |  |  |  | **0.11** | **0.16** | -0.03 |
| **Individual-level predictors** | |  |  |  |  |  |  |  |  |  |
| Denomination (ref. = non-Muslim) | |  |  |  |  |  |  |  |  |  |
|  | Muslim | **0.51** | **0.43** | **0.55** | **0.51** | **0.42** | **0.53** | **0.51** | **0.42** | **0.55** |
| Religiosity (ref. = not highly rel. Mus.) | |  |  |  |  |  |  |  |  |  |
|  | Highly religious Muslim | **0.20** | **0.16** | **0.29** | **0.20** | **0.16** | **0.29** | **0.20** | **0.16** | **0.29** |
|  | * American interventions | -0.04 | -0.05 | -0.01 |  |  |  |  |  |  |
|  | * Muslim shares |  |  |  | **-0.07** | **-0.09** | 0.02 |  |  |  |
|  | * Highly religious Muslim shares |  |  |  |  |  |  | **-0.07** | **-0.09** | -0.06 |
| Economic deprivation 1 (ref. = not dep.) | |  |  |  |  |  |  |  |  |  |
|  | Economically deprived | 0.00 | **-0.05** | -0.03 | 0.00 | **-0.05** | -0.03 | 0.00 | **-0.05** | -0.03 |
| Societal dissatisfaction | |  |  | **-0.03** |  |  | **-0.03** |  |  | **-0.03** |
|  | Societally dissatisfied (ref. = not) | **0.13** | **0.12** |  | **0.13** | **0.12** |  | **0.13** | **0.12** |  |
|  | Missing | **0.07** | **0.06** |  | **0.06** | **0.06** |  | **0.06** | **0.06** |  |
| **Control variables** | |  |  |  |  |  |  |  |  |  |
| Sex (ref. = male) | |  |  |  |  |  |  |  |  |  |
|  | Female | 0.01 | 0.01 | 0.00 | 0.01 | 0.02 | 0.00 | 0.01 | 0.02 | 0.00 |
| Age | | **0.00** | **0.00** | **-0.01** | **0.00** | **0.00** | **-0.01** | **0.00** | **0.00** | **-0.01** |
| Education | | **-0.01** | **-0.02** | **-0.10** | **-0.01** | **-0.02** | **-0.10** | **-0.01** | **-0.02** | **-0.10** |
| Income (ref. = low) | |  |  |  |  |  |  |  |  |  |
|  | Medium | **-0.04** | **-0.05** | 0.00 | **-0.04** | **-0.05** | 0.00 | **-0.04** | **-0.05** | **0.00** |
|  | High | **-0.09** | **-0.14** | **-0.11** | **-0.09** | **-0.14** | **-0.11** | **-0.09** | **-0.14** | -0.11 |
| Marital status (ref. = single) | |  |  |  |  |  |  |  |  |  |
|  | Married | 0.01 | 0.02 | 0.01 | 0.01 | 0.02 | 0.01 | 0.01 | 0.02 | 0.01 |
|  | Widowed | 0.03 | 0.03 |  | 0.04 | 0.03 |  | 0.04 | 0.03 |  |
|  | Separated | 0.02 | 0.02 |  | 0.02 | 0.02 |  | 0.02 | 0.03 |  |
|  | Divorced | 0.00 | 0.07 |  | 0.00 | 0.07 |  | 0.00 | 0.07 |  |
|  | Other |  |  | 0.07 |  |  | 0.07 |  |  | 0.07 |
| Employment status (ref. = employed) | |  |  |  |  |  |  |  |  |  |
|  | Non-employed |  |  | 0.01 |  |  | 0.01 |  |  | 0.02 |
| Internet use (ref. = never) | |  |  |  |  |  |  |  |  |  |
|  | Yearly or monthly |  |  | 0.01 |  |  | 0.01 |  |  | 0.01 |
|  | Weekly |  |  | **-0.16** |  |  | **-0.16** |  |  | **-0.16** |
|  | Daily |  |  | **-0.28** |  |  | **-0.28** |  |  | **-0.28** |
|  | Missing |  |  | 0.17 |  |  | 0.17 |  |  | 0.17 |
| Months spent in West (ref. = none) | |  |  |  |  |  |  |  |  |  |
|  | Less than three |  |  | **-0.33** |  |  | **-0.34** |  |  | **-0.34** |
|  | Less than six |  |  | **-0.24** |  |  | **-0.24** |  |  | **-0.24** |
|  | More than six |  |  | **-0.27** |  |  | **-0.27** |  |  | **-0.27** |
|  | Missing |  |  | **0.23** |  |  | **0.22** |  |  | **0.25** |
| **Intercept** | | **1.35** | **1.20** | **-0.50** | **1.35** | **1.20** | **-0.50** | **1.34** | **1.20** | **-0.49** |
| **Variances** | |  |  |  |  |  |  |  |  |  |
|  | Intercept | 0.07 | 0.07 | 0.31 | 0.07 | 0.06 | 0.25 | 0.08 | 0.08 | 0.31 |
|  | Highly religious Muslim | 0.04 | 0.03 | 0.05 | 0.04 | 0.02 | 0.05 | 0.04 | 0.02 | 0.04 |

Sources: AB and GAP. Bold indicators indicate significance at α=0.05.

Appendix A4. *Multilevel (logit) models of anti-Americanism with economic deprivation moderations.*

|  |  | A10a | A10b | A10c | A11a | A11b | A11c | A12a | A12b | A12c |
| --- | --- | --- | --- | --- | --- | --- | --- | --- | --- | --- |
|  |  | Political | Societal | Societal | Political | Societal | Societal | Political | Societal | Societal |
|  |  | 32 GAP | 32 GAP | 34 AB | 32 GAP | 32 GAP | 34 AB | 32 GAP | 32 GAP | 34 AB |
| **Context-level predictors** | |  |  |  |  |  |  |  |  |  |
| American interventions | | **0.13** | **0.17** | 0.08 |  |  |  |  |  |  |
| Muslim shares | |  |  |  | **0.10** | **0.15** | **0.26** |  |  |  |
| Highly religious Muslim shares | |  |  |  |  |  |  | 0.07 | **0.11** | -0.08 |
| **Individual-level predictors** | |  |  |  |  |  |  |  |  |  |
| Denomination (ref. = non-Muslim) | |  |  |  |  |  |  |  |  |  |
|  | Muslim | **0.55** | **0.48** | **0.52** | **0.55** | **0.48** | **0.51** | **0.55** | **0.48** | **0.52** |
| Religiosity (ref. = not highly rel. Mus.) | |  |  |  |  |  |  |  |  |  |
|  | Highly religious Muslim | **0.20** | **0.16** | **0.32** | **0.20** | **0.16** | **0.32** | **0.20** | **0.16** | **0.32** |
| Economic deprivation 1 (ref. = not dep.) | |  |  |  |  |  |  |  |  |  |
|  | Economically deprived | 0.00 | **-0.06** | -0.05 | 0.01 | -0.05 | -0.05 | 0.01 | -0.05 | -0.05 |
|  | * American interventions | -0.03 | -0.01 | **0.10** |  |  |  |  |  |  |
|  | * Muslim shares |  |  |  | -0.06 | -0.03 | 0.00 |  |  |  |
|  | * Highly religious Muslim shares |  |  |  |  |  |  | -0.06 | -0.04 | -0.03 |
| Societal dissatisfaction | |  |  | **-0.03** |  |  | **-0.03** |  |  | **-0.03** |
|  | Societally dissatisfied (ref. = not) | **0.14** | **0.13** |  | **0.14** | **0.13** |  | **0.14** | **0.13** |  |
|  | Missing | **0.08** | **0.07** |  | **0.08** | **0.07** |  | **0.08** | **0.07** |  |
| **Control variables** | |  |  |  |  |  |  |  |  |  |
| Sex (ref. = male) | |  |  |  |  |  |  |  |  |  |
|  | Female | 0.01 | 0.02 | 0.00 | 0.01 | 0.02 | -0.01 | 0.01 | 0.02 | -0.01 |
| Age | | **0.00** | **0.00** | **-0.01** | **0.00** | **0.00** | **-0.01** | **0.00** | **0.00** | **-0.01** |
| Education | | -0.01 | **-0.02** | **-0.10** | -0.01 | **-0.02** | **-0.10** | -0.01 | **-0.02** | **-0.10** |
| Income (ref. = low) | |  |  |  |  |  |  |  |  |  |
|  | Medium | **-0.04** | **-0.05** | 0.00 | **-0.04** | **-0.05** | 0.00 | **-0.04** | **-0.05** | 0.00 |
|  | High | **-0.09** | **-0.14** | **-0.11** | **-0.09** | **-0.14** | **-0.11** | **-0.09** | **-0.14** | **-0.11** |
| Marital status (ref. = single) | |  |  |  |  |  |  |  |  |  |
|  | Married | 0.01 | 0.02 | 0.00 | 0.01 | 0.02 | 0.00 | 0.01 | 0.02 | 0.00 |
|  | Widowed | 0.03 | 0.03 |  | 0.03 | 0.03 |  | 0.03 | 0.03 |  |
|  | Separated | -0.01 | 0.00 |  | -0.01 | 0.00 |  | -0.01 | 0.00 |  |
|  | Divorced | 0.00 | 0.08 |  | 0.00 | 0.08 |  | 0.00 | 0.08 |  |
|  | Other |  |  | 0.07 |  |  | 0.07 |  |  | 0.07 |
| Employment status (ref. = employed) | |  |  |  |  |  |  |  |  |  |
|  | Non-employed |  |  | 0.01 |  |  | 0.01 |  |  | 0.01 |
| Internet use (ref. = never) | |  |  |  |  |  |  |  |  |  |
|  | Yearly or monthly |  |  | 0.02 |  |  | 0.02 |  |  | 0.02 |
|  | Weekly |  |  | **-0.15** |  |  | **-0.16** |  |  | **-0.16** |
|  | Daily |  |  | **-0.27** |  |  | **-0.27** |  |  | **-0.27** |
|  | Missing |  |  | 0.17 |  |  | 0.17 |  |  | 0.17 |
| Months spent in West (ref. = none) | |  |  |  |  |  |  |  |  |  |
|  | Less than three |  |  | **-0.33** |  |  | **-0.33** |  |  | **-0.33** |
|  | Less than six |  |  | **-0.27** |  |  | **-0.27** |  |  | **-0.27** |
|  | More than six |  |  | **-0.27** |  |  | **-0.27** |  |  | **-0.27** |
|  | Missing |  |  | **0.22** |  |  | **0.21** |  |  | **0.24** |
| **Intercept** | | **1.30** | **1.14** | **-0.49** | **1.29** | **1.13** | **-0.50** | **1.29** | **1.13** | **-0.49** |
| **Variances** | |  |  |  |  |  |  |  |  |  |
|  | Intercept | 0.06 | 0.05 | 0.33 | 0.07 | 0.06 | 0.27 | 0.07 | 0.07 | 0.33 |
|  | Economic deprivation | 0.03 | 0.01 | 0.03 | 0.03 | 0.01 | 0.05 | 0.03 | 0.00 | 0.05 |

Sources: AB and GAP. Bold indicators indicate significance at α = 0.05.

Appendix A5. *Multilevel (logit) models of anti-Americanism with societal dissatisfaction moderations.*

|  |  | A13a | A13b | A13c | A14a | A14b | A14c | A15a | A15b | A15c |
| --- | --- | --- | --- | --- | --- | --- | --- | --- | --- | --- |
|  |  | Political | Societal | Societal | Political | Societal | Societal | Political | Societal | Societal |
|  |  | 32 GAP | 32 GAP | 34 AB | 32 GAP | 32 GAP | 34 AB | 32 GAP | 32 GAP | 34 AB |
| **Context-level predictors** | |  |  |  |  |  |  |  |  |  |
| American interventions | | **0.10** | **0.13** | 0.11 |  |  |  |  |  |  |
| Muslim shares | |  |  |  | 0.04 | 0.05 | **0.25** |  |  |  |
| Highly religious Muslim shares | |  |  |  |  |  |  | 0.01 | 0.02 | -0.07 |
| **Individual-level predictors** | |  |  |  |  |  |  |  |  |  |
| Denomination (ref. = non-Muslim) | |  |  |  |  |  |  |  |  |  |
|  | Muslim | **0.54** | **0.47** | **0.53** | **0.54** | **0.47** | **0.50** | **0.54** | **0.47** | **0.52** |
| Religiosity (ref. = not highly rel. Mus.) | |  |  |  |  |  |  |  |  |  |
|  | Highly religious Muslim | **0.19** | **0.15** | **0.33** | **0.19** | **0.15** | **0.33** | **0.19** | **0.15** | **0.33** |
| Economic deprivation 1 (ref. = not dep.) | |  |  |  |  |  |  |  |  |  |
|  | Economically deprived | 0.00 | **-0.05** | -0.03 | 0.00 | **-0.05** | -0.03 | 0.00 | **-0.05** | -0.03 |
| Societal dissatisfaction | |  |  | 0.00 |  |  | 0.00 |  |  | -0.01 |
|  | Societally dissatisfied (ref. = not) | **0.11** | 0.09 |  | **0.11** | 0.09 |  | **0.11** | 0.09 |  |
|  | * American interventions | 0.00 | 0.03 | 0.01 |  |  |  |  |  |  |
|  | * Muslim shares |  |  |  | 0.06 | *0.09* | 0.03 |  |  |  |
|  | * Highly religious Muslim shares |  |  |  |  |  |  | 0.05 | 0.08 | *0.06* |
|  | Missing | 0.08 | 0.06 |  | 0.09 | 0.07 |  | 0.08 | 0.06 |  |
| **Control variables** | |  |  |  |  |  |  |  |  |  |
| Sex (ref. = male) | |  |  |  |  |  |  |  |  |  |
|  | Female | 0.00 | 0.01 | 0.00 | 0.00 | 0.01 | 0.00 | 0.00 | 0.01 | 0.00 |
| Age | | **0.00** | **0.00** | **-0.01** | **0.00** | **0.00** | **-0.01** | **0.00** | **0.00** | **-0.01** |
| Education | | 0.00 | **-0.01** | **-0.10** | 0.00 | **-0.01** | **-0.10** | 0.00 | **-0.01** | **-0.10** |
| Income (ref. = low) | |  |  |  |  |  |  |  |  |  |
|  | Medium | **-0.05** | **-0.05** | -0.01 | **-0.05** | **-0.05** | -0.01 | **-0.05** | **-0.05** | 0.00 |
|  | High | **-0.11** | **-0.15** | **-0.11** | **-0.11** | **-0.15** | **-0.11** | **-0.11** | **-0.15** | **-0.11** |
| Marital status (ref. = single) | |  |  |  |  |  |  |  |  |  |
|  | Married | 0.01 | 0.02 | 0.00 | 0.01 | 0.02 | 0.00 | 0.01 | 0.02 | 0.00 |
|  | Widowed | 0.05 | 0.04 |  | 0.05 | 0.04 |  | 0.05 | 0.04 |  |
|  | Separated | -0.02 | 0.00 |  | -0.02 | 0.00 |  | -0.02 | 0.00 |  |
|  | Divorced | 0.00 | 0.08 |  | 0.00 | 0.08 |  | 0.00 | 0.08 |  |
|  | Other |  |  | 0.07 |  |  | 0.07 |  |  | 0.07 |
| Employment status (ref. = employed) | |  |  |  |  |  |  |  |  |  |
|  | Non-employed |  |  | 0.01 |  |  | 0.01 |  |  | 0.01 |
| Internet use (ref. = never) | |  |  |  |  |  |  |  |  |  |
|  | Yearly or monthly |  |  | 0.02 |  |  | 0.02 |  |  | 0.02 |
|  | Weekly |  |  | **-0.15** |  |  | **-0.16** |  |  | **-0.16** |
|  | Daily |  |  | **-0.27** |  |  | **-0.27** |  |  | **-0.27** |
|  | Missing |  |  | 0.18 |  |  | 0.18 |  |  | 0.18 |
| Months spent in West (ref. = none) | |  |  |  |  |  |  |  |  |  |
|  | Less than three |  |  | **-0.33** |  |  | **-0.33** |  |  | **-0.33** |
|  | Less than six |  |  | **-0.26** |  |  | **-0.26** |  |  | **-0.26** |
|  | More than six |  |  | **-0.29** |  |  | **-0.29** |  |  | **-0.29** |
|  | Missing |  |  | **0.21** |  |  | **0.20** |  |  | **0.22** |
| **Intercept** | | **1.35** | **1.19** | **-0.51** | **1.35** | **1.19** | **-0.50** | **1.35** | **1.19** | **-0.50** |
| **Variances** | |  |  |  |  |  |  |  |  |  |
|  | Intercept | 0.10 | 0.11 | 0.32 | 0.11 | 0.12 | 0.27 | 0.11 | 0.12 | 0.32 |
|  | Political dissatisfaction | 0.11 | 0.11 | 0.05 | 0.11 | 0.10 | 0.05 | 0.11 | 0.10 | 0.04 |
|  | Missing pol. dissatisfaction | 0.10 | 0.08 |  | 0.10 | 0.08 |  | 0.10 | 0.08 |  |

Sources: AB and GAP. Bold indicators indicate significance at α=0.05; italics indicate significance at α=0.10.

**Appendix A6. Explanation of robustness tests**

We conducted the following robustness tests.

Concerning American interventions, we also analyzed the impact of American military presence, American military investments, and American economic investments separately. We additionally estimated our compound-measure models controlling for MENA countries’ GDP.

Concerning religion, to ascertain that our dichotomy of Muslims and non-Muslims, although theoretically fitting, does not obscure results, we used information available in a few GAP and AB surveys on respondents’ particular denomination (Shiite, Sunni, and non-Muslim). We also tested whether our results on Muslims and non-Muslims remained similar when we included religious service attendance (attending ‘rarely or never’ (0), ‘sometimes’ (1), ‘most of the time’ (2), or ‘always’ (3)) available in AB waves 2 and 3.

Concerning relative deprivation, we operationalized two alternative economic relative deprivation measures. *Economic deprivation 2* which widened the boundaries of education to about 45 percent being considered as ‘highly educated’. *Economic deprivation 3* considers respondents among the 50 percent highest educated but lowest 50 percent in terms of income as deprived. Also, we included respondents’ more subjective economic deprivation (believing incomes allowed respondents to save (0), covered their expenses (1), or created some (2) or significant (3) difficulties) available in AB waves 2 and 3. Additionally, to check whether especially deprivation was gender-specific, we estimated our main models in only-men and only-women subsamples.

Concerning modeling procedures, we estimated the AB moderation models as multilevel linear probability models too, given the limitations of logistic models (Mood, 2010). We also analyzed whether certain surveys had extremely high or low scores on American interventions, shares of Muslims, and shares of highly religious Muslims, and also analyzed our models excluding these outliers. Finally, we did the same for surveys in which relations between denomination, being a highly religious Muslim, economic deprivation, and societal dissatisfaction and anti-Americanism were outliers (i.e., extreme b-coefficients).

Table A6. *Descriptive statistics of robustness variables*

|  |  | GAP | | | | AB | | | |
| --- | --- | --- | --- | --- | --- | --- | --- | --- | --- |
|  |  | Min. | Max. | Mean | SD | Min. | Max. | Mean | SD |
| Muslim denomination | |  |  |  |  |  |  |  |  |
|  | Shiite | 0 | 1 | 0.08 |  | 0 | 1 | 0.25 |  |
|  | Sunni | 0 | 1 | 0.76 |  | 0 | 1 | 0.53 |  |
|  | Non-Muslim | 0 | 1 | 0.16 |  | 0 | 1 | 0.22 |  |
| Economic deprivation 2 | | 0 | 1 | 0.07 |  | 0 | 1 | 0.08 |  |
| Economic deprivation 3 | | 0 | 1 | 0.20 |  | 0 | 1 | 0.21 |  |
| Religious service attendance | | |  |  |  | 0 | 3 | 1.93 | 1.24 |
| Subjective economic deprivation | | |  |  |  | 0 | 3 | 1.74 | 0.94 |
| American military presence* | | 0 | 360 | 82.36 | 115.93 | 0.00 | 28675 | 1371 | 5467 |
| American military investments* | | 0 | 188944 | 47346 | 62064 | 0.00 | 135531 | 18408 | 34662 |
| American economic investments* | | 0 | 2.22 | 0.51 | 0.75 | 0.00 | 282357 | 49945 | 68458 |
| GDP* |  | 3782 | 90004 | 11791 | 10058 | 3175 | 73513 | 13102 | 13472 |

Sources: GAP and AB. *indicates variable was standardized for analyses.
